# Supplementary material
Source: PubMed Central journal article supplement (PMC7902392)
Supplement: NIHMS1630664-supplement-sup_01.pdf [file NIHMS1630664-supplement-sup_01.pdf]

**Supplemental Table 1 – Coding of Surgery Categories and Associated Examples**

| Surgery Category              | Common Procedure Terminology (CPT) Codes                                                                                                                                                                                                                                                                                                                                                                                                                                                                                                                                                                                                                                                                                                                                                                                                                                      | Examples                                                                                                                                                                   |
|-------------------------------|-------------------------------------------------------------------------------------------------------------------------------------------------------------------------------------------------------------------------------------------------------------------------------------------------------------------------------------------------------------------------------------------------------------------------------------------------------------------------------------------------------------------------------------------------------------------------------------------------------------------------------------------------------------------------------------------------------------------------------------------------------------------------------------------------------------------------------------------------------------------------------|----------------------------------------------------------------------------------------------------------------------------------------------------------------------------|
| <b>Abdominal Wall</b>         | 11008, 35840, 49250, 49491, 49492, 49495, 49500, 49505, 49507, 49520, 49521, 49525, 49550, 49553, 49557, 49560, 49561, 49565, 49566, 49568, 49570, 49572, 49580, 49582, 49585, 49587, 49590, 49600, 49650, 49651, 49652, 49653, 49654, 49655, 49656, 49657, 49659, 49900, 49904, 49999                                                                                                                                                                                                                                                                                                                                                                                                                                                                                                                                                                                        | Inguinal hernia repair, umbilical hernia repair, incisional/ventral hernia repair                                                                                          |
| <b>Vascular</b>               | 33320, 33322, 33845, 33860, 33863, 33864, 33875, 33877, 33880, 33881, 33891, 33916, 34001, 34101, 34151, 34201, 34421, 34701, 34703, 34705, 34800, 34802, 34803, 34804, 34808, 34825, 34830, 34831, 34841, 34844, 34845, 35001, 35002, 35013, 35081, 35091, 35102, 35111, 35121, 35141, 35142, 35151, 35189, 35251, 35256, 35281, 35301, 35302, 35303, 35305, 35331, 35355, 35371, 35372, 35501, 35506, 35518, 35521, 35522, 35523, 35533, 35539, 35540, 35556, 35558, 35565, 35566, 35571, 35583, 35585, 35606, 35621, 35623, 35646, 35647, 35654, 35656, 35661, 35665, 35666, 35879, 35883, 35903, 35907, 37140, 37160, 75952, 75953                                                                                                                                                                                                                                        | Thromboendarterectomy (carotid, vertebral, femoral, subclavian), bypass graft (femoral-popliteal, femoral-femoral)                                                         |
| <b>Major Orthopedic</b>       | 27076, 27090, 27091, 27122, 27125, 27130, 27132, 27134, 27137, 27138, 27187, 27227, 27228, 27236, 27244, 27245, 27248, 27253, 27254, 27269, 27290, 27329, 27440, 27441, 27442, 27443, 27445, 27446, 27447, 27472, 27486, 27487, 27488, 27495, 27506, 27507, 27511, 27514, 27524, 27535, 27536, 27540, 27580, 27590, 27591, 27592, 27594, 27596, 27598, 27758, 27759, 27784, 27827, 27828, 27829, 27832, 27848, 27880, 27881, 27882, 27884, 27886                                                                                                                                                                                                                                                                                                                                                                                                                              | Total knee arthroplasty, total hip arthroplasty, amputation through femur, amputation through tibia/fibula, open treatment of femoral neck fracture with internal fixation |
| <b>Chest*</b>                 | 21630, 32035, 32096, 32097, 32098, 32100, 32110, 32120, 32140, 32150, 32160, 32220, 32225, 32320, 32440, 32480, 32482, 32491, 32500, 32503, 32505, 32650, 32651, 32652, 32654, 32656, 32657, 32658, 32659, 32660, 32661, 32662, 32663, 32666, 32667, 32668, 32669, 32673, 32800, 32820, 35820, 38381, 38746, 39220, 43107, 43112, 43113, 43116, 43314, 43328, 43352                                                                                                                                                                                                                                                                                                                                                                                                                                                                                                           | Pulmonary lobectomy, thoracoscopy with lobectomy, pleurodesis, wedge resection                                                                                             |
| <b>Cardiac*</b>               | 33025, 33030, 33031, 33120, 33250, 33251, 33255, 33256, 33257, 33258, 33300, 33315, 33400, 33404, 33405, 33406, 33410, 33412, 33420, 33422, 33425, 33426, 33430, 33465, 33496, 33500, 33501, 33504, 33510, 33511, 33512, 33513, 33517, 33518, 33519, 33530, 33533, 33534, 33535, 33572, 33641, 33945, 33975, 33976, 33991                                                                                                                                                                                                                                                                                                                                                                                                                                                                                                                                                     | Aortic valve replacement (with cardiopulmonary bypass), coronary artery bypass graft, mitral valve replacement (with cardiopulmonary bypass)                               |
| <b>Abdominal†</b>             | 38100, 38102, 38120, 38573, 38747, 39502, 43117, 43118, 43121, 43122, 43123, 43279, 43280, 43281, 43282, 43330, 43337, 43361, 43425, 43510, 43620, 43621, 43622, 43631, 43632, 43644, 43653, 43659, 43770, 43775, 43820, 43830, 43831, 43845, 43860, 43880, 44005, 44020, 44050, 44110, 44111, 44120, 44121, 44130, 44139, 44140, 44141, 44143, 44144, 44145, 44146, 44147, 44150, 44151, 44155, 44158, 44160, 44180, 44186, 44187, 44188, 44202, 44204, 44205, 44206, 44207, 44208, 44210, 44211, 44213, 44227, 44238, 44310, 44312, 44314, 44320, 44620, 44625, 44626, 44640, 44660, 44661, 44799, 44820, 44950, 44960, 44970, 45110, 45111, 45395, 45563, 47562, 47563, 47564, 47600, 47605, 47612, 47740, 47741, 47780, 48105, 48140, 48145, 48146, 48150, 48153, 48154, 48155, 48520, 48548, 49000, 49002, 49020, 49255, 49320, 49321, 49322, 49324, 49325, 49329, 49402 | Cholecystectomy, exploratory laparotomy, colectomy, laparoscopy for diagnosis or washout, appendectomy, pancreatectomy (Whipple)                                           |
| <b>Central Nervous System</b> | 61304, 61305, 61312, 61313, 61314, 61343, 61500, 61510, 61512, 61516, 61518, 61520, 61521, 61546, 61556, 61580, 61590, 61697, 61705, 61781, 62141, 62142, 62143                                                                                                                                                                                                                                                                                                                                                                                                                                                                                                                                                                                                                                                                                                               | Craniectomy or craniotomy for evacuation of hematoma, excision of tumor, exploration, excision of meningioma                                                               |

\* Chest and cardiac surgeries were combined into one group for modeling

† Abdominal surgeries were further characterized as laparoscopic or open for modeling

## Supplemental Table 2 – Knot Specifications for Restricted Cubic Spline Basis Functions

| Variable                        | Knot Selections    |
|---------------------------------|--------------------|
| Albumin (g/dL)                  | 2.7, 3.7, 4.4      |
| Sodium (mEq/L)                  | 132, 137, 141, 145 |
| Platelet Count (1,000/ $\mu$ L) | 75, 152, 271       |

\* Note that creatinine and international normalized ratio (INR) were modeled as linear relationships to the outcome

**Supplemental Table 3: Model Selection Statistics and Discrimination for 30-day Post-Operative Mortality Among a Final Series of Candidate Models in the Derivation Set**

| Model                                                                                                                                        | Number of Input Variables | Discrimination | Aikake Information Criterion (AIC) | Bayesian Information Criterion (BIC) |
|----------------------------------------------------------------------------------------------------------------------------------------------|---------------------------|----------------|------------------------------------|--------------------------------------|
| <b>*ASA (ordinal) + platelet count + emergency status + surgery category + albumin + total bilirubin + obesity + NAFLD</b>                   | 8                         | 0.8723         | 744.6377                           | 837.3844                             |
| <b>ASA (ordinal) + platelet count + emergency status + surgery category + albumin + total bilirubin + obesity</b>                            | 7                         | 0.8673         | 751.6791                           | 838.2428                             |
| <b>ASA (binary) + platelet count + emergency status + surgery category + albumin + total bilirubin + obesity</b>                             | 7                         | 0.8554         | 762.5705                           | 849.1342                             |
| <b>ASA (ordinal) + ascites + emergency status + surgery category + albumin + total bilirubin + obesity</b>                                   | 7                         | 0.8635         | 756.616                            | 837.0798                             |
| <b>ASA (ordinal) + platelet count + ascites + emergency status + surgery category + albumin + total bilirubin + obesity</b>                  | 8                         | 0.8690         | 749.3014                           | 842.0482                             |
| <b>*ASA (ordinal) + platelet count + emergency status + surgery category + albumin + total bilirubin + obesity + atrial fibrillation</b>     | 8                         | 0.8690         | 750.5888                           | 843.3355                             |
| <b>*ASA (ordinal) + platelet count + emergency status + surgery category + albumin + total bilirubin + obesity + coronary artery disease</b> | 8                         | 0.8674         | 753.6614                           | 846.4082                             |
| <b>*ASA (ordinal) + platelet count + emergency status + surgery category + albumin + total bilirubin + obesity + hypertension</b>            | 8                         | 0.8669         | 753.3128                           | 846.0596                             |
| <b>*ASA (ordinal) + platelet count + emergency status + surgery category + albumin + total bilirubin + obesity + diabetes mellitus</b>       | 8                         | 0.8674         | 753.5988                           | 846.3456                             |

*Abbreviations: ASA = American Society of Anesthesiologists*

*\* Final selected 30-day post-operative mortality model. This model maximized discrimination and minimized AIC and BIC. Addition of NAFLD improved models beyond inclusion of obesity alone. Models with ASA modeled as a binary variable were uniformly inferior (in terms of discrimination, AIC, and BIC) to ASA modeled as an ordinal variable. Addition of ascites did not improve models if platelet count was already in the model. Substitution of ascites for platelet count resulted in equivocal changes to model performance parameters.*

**Supplemental Table 4: Discrimination (C-statistics) of Post-Operative Mortality for the VOCAL-Penn Models at 30, 90, and 180 Days when Restricted to Female Sex**

| <b>Risk Score</b>                                        | <b>30-Day</b>                | <b>90-Day</b>                | <b>180-Day</b>               |
|----------------------------------------------------------|------------------------------|------------------------------|------------------------------|
| <b>Derivation</b><br><b>Cohort:</b><br><i>VOCAL-Penn</i> | <b>0.960 (0.920 – 1.000)</b> | <b>0.957 (0.919 – 0.995)</b> | <b>0.893 (0.780 – 1.000)</b> |
| <b>Validation</b><br><b>Cohort:</b><br><i>VOCAL-Penn</i> | <b>(no events)</b>           | <b>(no events)</b>           | <b>0.940 (0.845 – 1.000)</b> |

**Supplemental Table 5: Discrimination (C-statistics) of Post-Operative Mortality for the VOCAL-Penn Models at 30, 90, and 180 Days when Restricted to First Surgeries among Unique Patients**

| <b>Risk Score</b>                                   | <b>30-Day</b>                | <b>90-Day</b>                | <b>180-Day</b>               |
|-----------------------------------------------------|------------------------------|------------------------------|------------------------------|
| <b>Derivation<br/>Cohort:<br/><i>VOCAL-Penn</i></b> | <b>0.888 (0.853 – 0.923)</b> | <b>0.844 (0.814 – 0.875)</b> | <b>0.818 (0.789 – 0.847)</b> |
| <b>Validation<br/>Cohort:<br/><i>VOCAL-Penn</i></b> | <b>0.855 (0.798 – 0.911)</b> | <b>0.820 (0.750 – 0.890)</b> | <b>0.814 (0.755 – 0.873)</b> |

**Supplemental Figure 1: Restricted Cubic Spline Modeling of 30-Day Post-Operative Mortality as a Function of Pre-Operative Platelet Count**

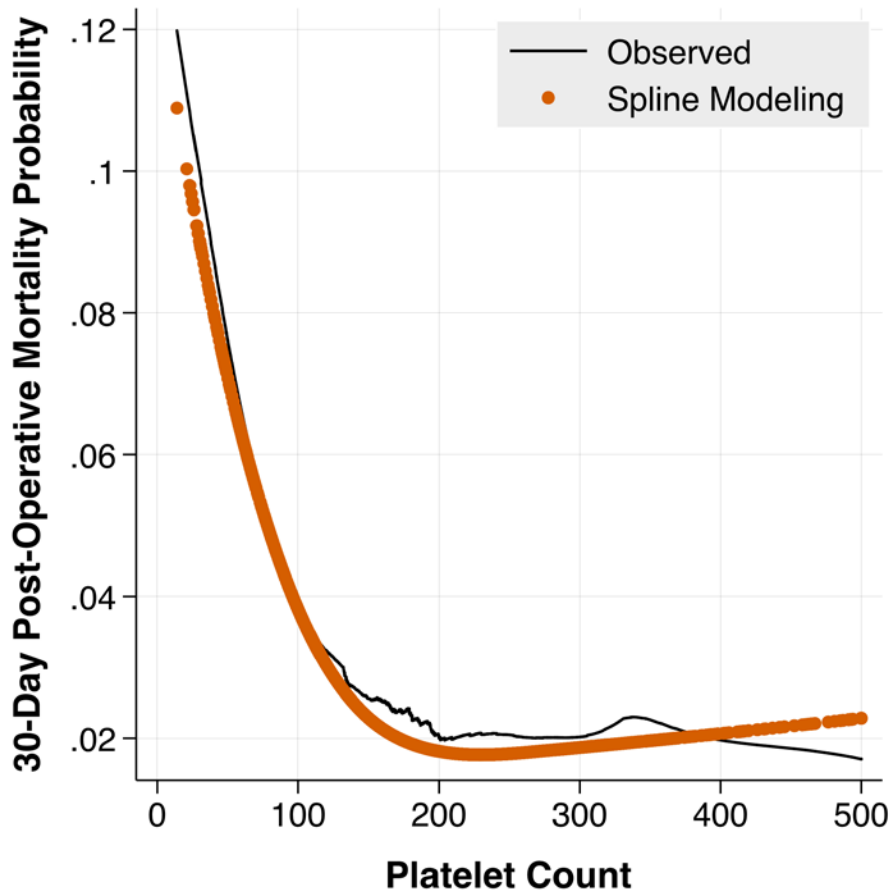

**Supplemental Figure 2: Patient Flow Diagram for Analytic Cohort Creation**

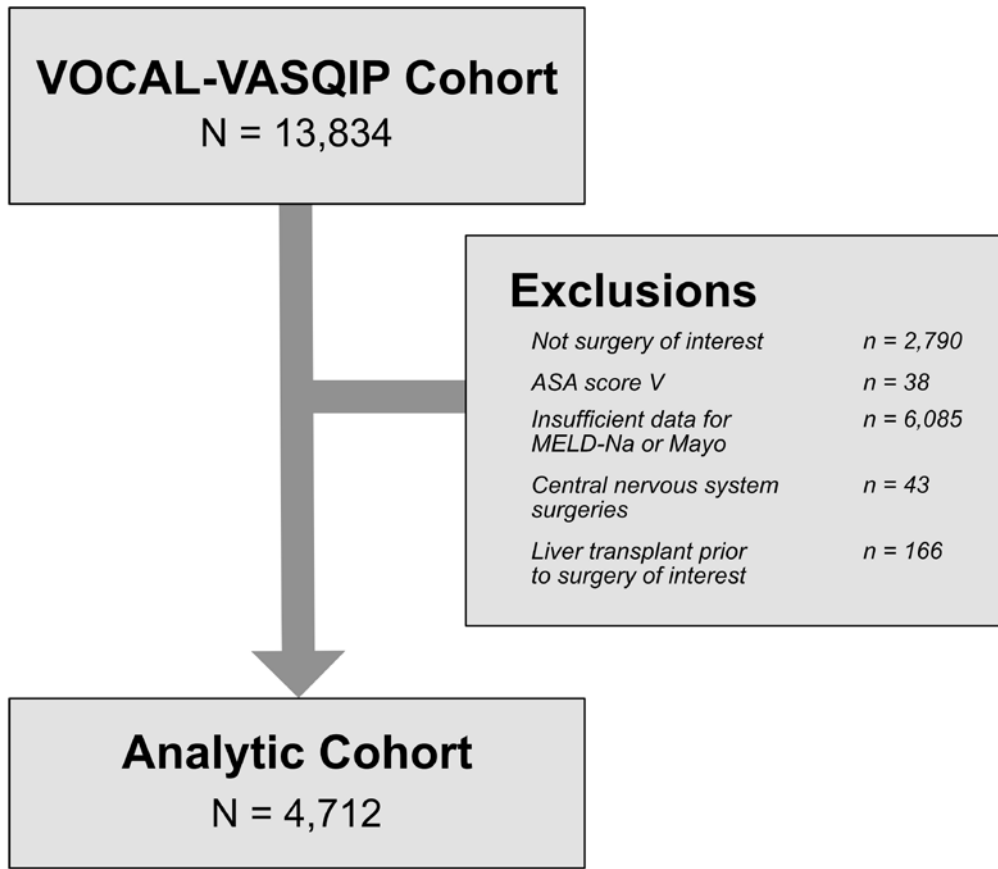

**Supplemental Figure 3: Pre-operative Platelet Count Distributions by ASA Classification**

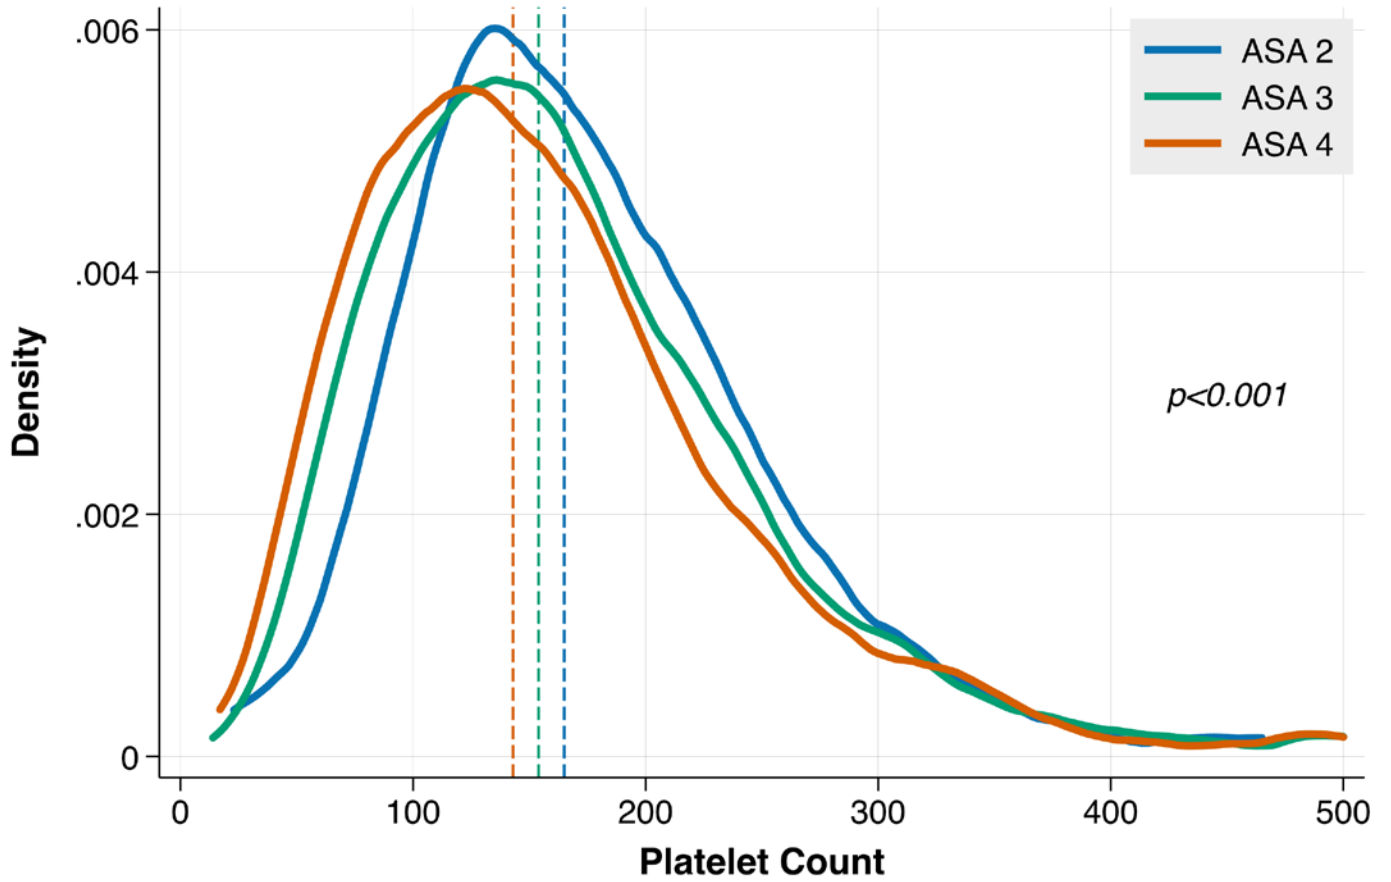

Abbreviations: ASA = American Society of Anesthesiologists

\* Vertical dashed lines denote distribution medians. Distributions were compared using the Kruskal-Wallis test



**Supplemental Figure 4: Post-operative Mortality Calibration of the Mayo Score over Time Restricted to Major Cardiovascular, Major Orthopedic, and Major Digestive Surgeries at 30 Days (A) and 90 Days (B), and Sum of Differences between Predicted and Observed Mortality over Time at 30 Days (C) and 90 Days (D)**

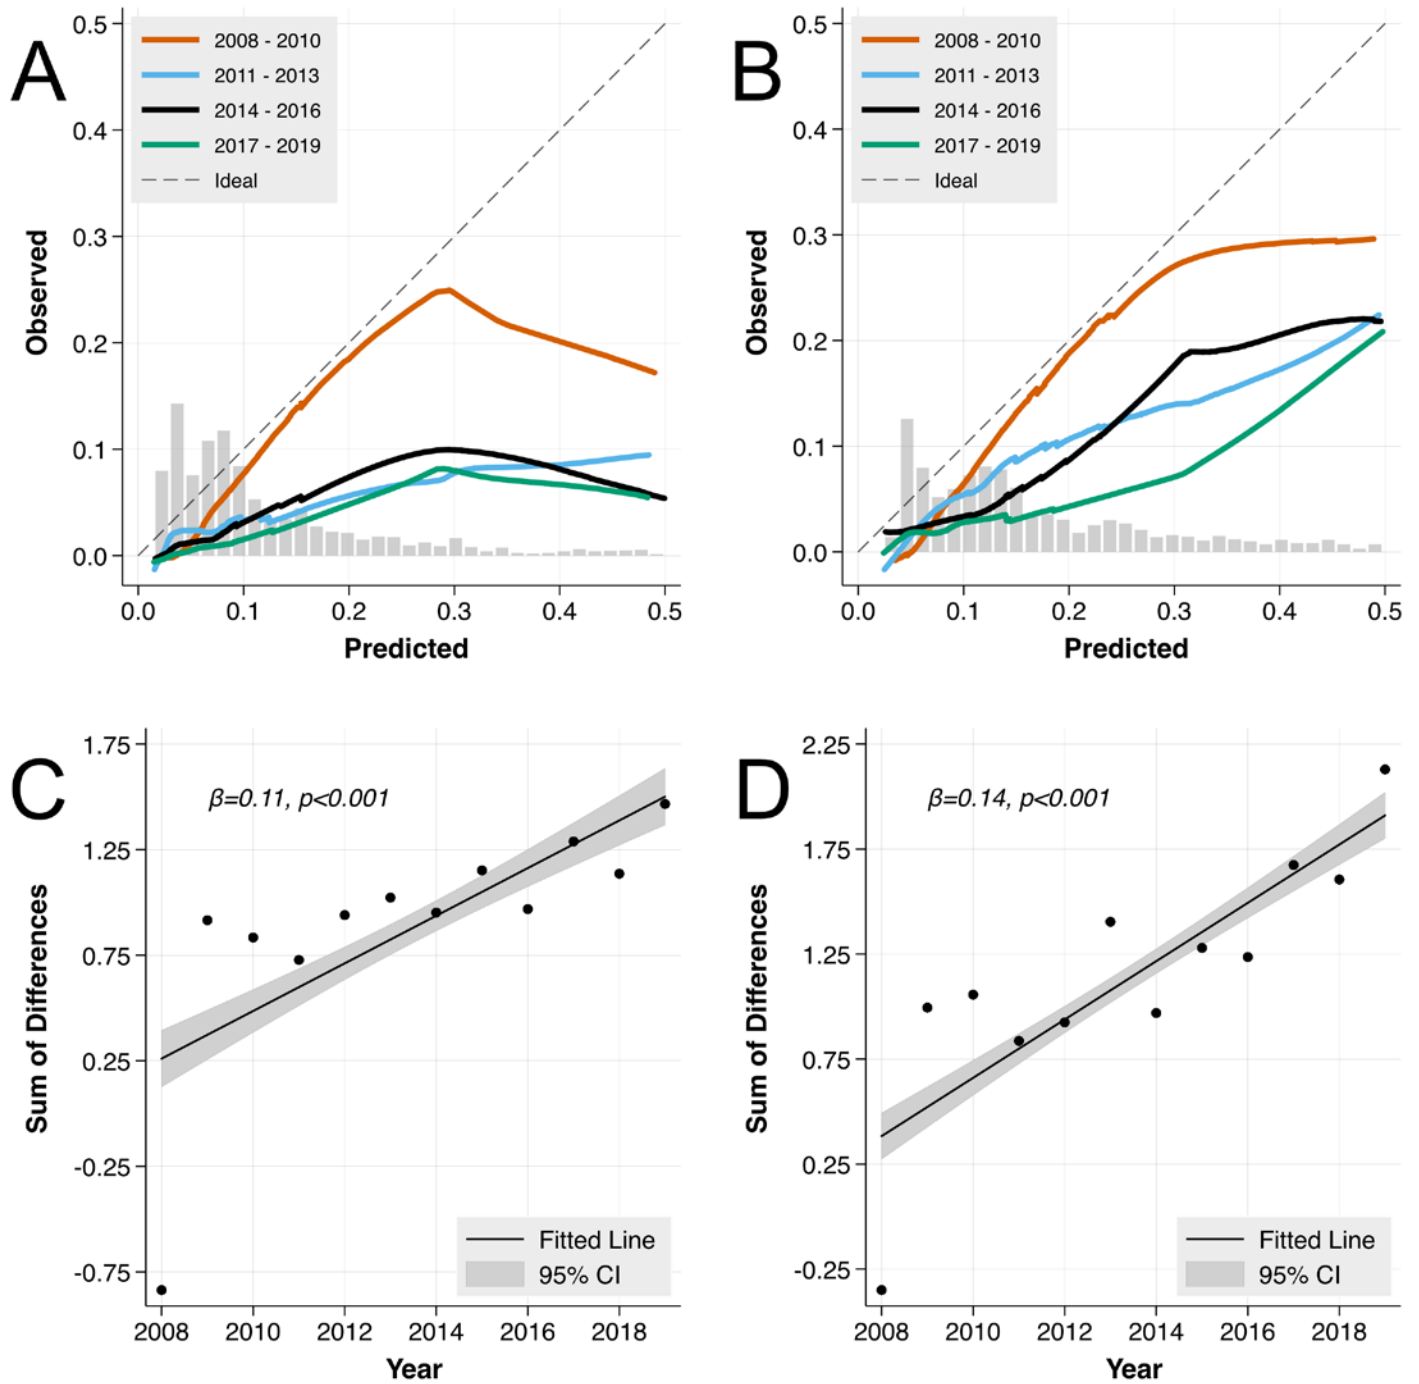

\* Overlaid histograms indicate the distribution of contributing data points

## Appendix – Derivation of Formulas Defining Surgical Risk Models

These formulas may be used for subsequent validation studies. The authors are also available to run the formulas on a large dataset if the necessary fields are provided, or to provide coding functions to calculate predicted probabilities on external data. If this is desired, please contact the corresponding author.

### *Step 1: Obtain Spline Basis Functions (refer to Supplemental Table 2 for knot locations)*

#### **For a three-knot cubic spline:**

Let  $k_1$ ,  $k_2$ , and  $k_3$  correspond to the knot locations

Let  $x$  correspond to the target variable

**Spline1** =  $x$

$$\text{Spline2} = ((x - k_1)^3 * (x > k_1) - (k_3 - k_2)^{-1} * ((x - k_2)^3 * (x > k_2) * (k_3 - k_1) - (x - k_3)^3 * (x > k_3) * (k_2 - k_1)))/(k_3 - k_1)^2$$

### *Step 2: Compute the Log Odds for Models*

#### **Post-operative Mortality at 30 Days:**

$$\begin{aligned} \log \text{ odds} = & -5.472096 + 1.061725 * \text{ASA} + 0.927904 * \text{emergency} + 1.56071 * \text{surgery}_{\text{open abdominal}} \\ & + 0.7418021 * \text{surgery}_{\text{abdominal wall}} + 0.9165415 * \text{surgery}_{\text{vascular}} + 1.464183 \\ & * \text{surgery}_{\text{major orthopedic}} + 1.893621 * \text{surgery}_{\text{chest/cardiac}} - 0.0075185 * \text{platelets}_{\text{sp1}} \\ & + 0.0036657 * \text{platelets}_{\text{sp2}} - 0.5181509 * \text{albumin}_{\text{sp1}} - 1.000672 * \text{albumin}_{\text{sp2}} \\ & + 0.1448936 * \text{bilirubin} - 0.7541669 * \text{obesity} + 0.8268748 * \text{NAFLD} \end{aligned}$$

#### **Post-operative Mortality at 90 Days:**

$$\begin{aligned} \log \text{ odds} = & -7.381628 + 0.6891587 * \text{ASA} + 0.6246303 * \text{emergency} + 0.0365738 * \text{age} + 1.349889 \\ & * \text{surgery}_{\text{open abdominal}} + 0.2480613 * \text{surgery}_{\text{abdominal wall}} + 1.054497 * \text{surgery}_{\text{vascular}} \\ & + 1.067452 * \text{surgery}_{\text{major orthopedic}} + 1.26527 * \text{surgery}_{\text{chest/cardiac}} - 0.4851036 \\ & * \text{albumin}_{\text{sp1}} - 0.9821122 * \text{albumin}_{\text{sp2}} + 0.82691 * \text{NAFLD} \end{aligned}$$

#### **Post-operative Mortality at 180 Days:**

$$\begin{aligned} \log \text{ odds} = & -6.169259 + 0.850114 * \text{ASA} + 0.0293034 * \text{age} + 0.8838124 * \text{surgery}_{\text{open abdominal}} \\ & + 0.197697 * \text{surgery}_{\text{abdominal wall}} + 0.4630691 * \text{surgery}_{\text{vascular}} + 0.1229086 \\ & * \text{surgery}_{\text{major orthopedic}} + 0.4320639 * \text{surgery}_{\text{chest cardiac}} - 0.003719 * \text{platelets}_{\text{sp1}} \\ & - 0.0004196 * \text{platelets}_{\text{sp2}} - 0.4560354 * \text{albumin}_{\text{sp1}} - 0.4166421 * \text{albumin}_{\text{sp2}} \\ & - 0.5176601 * \text{obesity} \end{aligned}$$

### *Step 3: Convert Log Odds to Predicted Probabilities (Unadjusted)*

$$\text{probability} = \frac{\exp(\log \text{ odds})}{1 + \exp(\log \text{ odds})}$$

### *Step 4: Obtain Final Adjusted Probabilities for Post-Operative Mortality*

Let  $p_{30\text{unadj}}$  = unadjusted probability at 30 days

Let  $p_{90\text{unadj}}$  = unadjusted probability at 90 days

Let  $p_{180\text{unadj}}$  = unadjusted probability at 180 days

Let  $p_{30\text{adj}}$  = adjusted probability at 30 days

*Let  $p_{90adj}$  = adjusted probability at 90 days*

*Let  $p_{180adj}$  = adjusted probability at 180 days*

$$p_{30adj} = p_{30unadj}$$

$$p_{90adj} = 1 - (1 - p_{30adj}) * (1 - p_{90unadj})$$

$$p_{180adj} = 1 - (1 - p_{30adj}) * (1 - p_{90unadj}) * (1 - p_{180unadj})$$
